# Supplementary material for: Biocidal activity of Ba2+-doped CeO2 NPs against Streptococcus mutans and Staphylococcus aureus bacterial strains
Source: Royal Society of Chemistry journal article supplement (doi:10.1039/d1ra05948c), 2021-01-01
Supplement: d1ra05948c1.pdf [file d1ra05948c1.pdf]

## Biocidal activity of Ba<sup>2+</sup> doped CeO<sub>2</sub> NPs tested against *Streptococcus mutans* and *Staphylococcus aureus* bacterial strains

Natarajan Sisubalan<sup>a</sup>, Chandrasekaran Karthikeyan<sup>b, c\*</sup>, Venugopal Senthil Kumar<sup>c</sup>  
Kokkarachedu Varaprasad<sup>b\*</sup>, Abdulrahman Syed ahamed Haja Hameed<sup>d</sup>, Ramar Vanajothi<sup>e</sup>,  
Rotimi Sadiku<sup>f</sup>

<sup>a</sup>Department of Botany, Bishop Heber College (Autonomous), Affiliated to Bharathidasan  
University, Trichy 620017, Tamil Nadu, India.

Centro de Investigacion de Polimeros Avanzados (CIPA), Avendia Collao 1202, Edificio de  
Laboratorios de CIPA, Concepcion, Chile.

KIRND Institute of Research and development PVT LTD, Tiruchirappalli 620020, Tamil Nadu,  
India.

PG and Research Department of Physics, Jamal Mohamed College (Affiliated to Bharathidasan  
University), Tiruchirappalli, Tamil Nady, 620 020, India.

Department of Zoology, Fatima College, Madurai 625001, Tamil Nadu, India.

Institute of NanoEngineering Research (INER), Department of Chemical, Metallurgical &  
Materials Engineering (Polymer Division), Tshwane University of Technology, Pretoria West  
Campus, Staatsarillerie Rd, Pretoria, 1083, South Africa.

### SI:

### Characterization Techniques

The CeO<sub>2</sub>, MgCeO<sub>2</sub>, CaCeO<sub>2</sub>, SrCeO<sub>2</sub> and BaCeO<sub>2</sub> NMs were characterized by X-ray diffractometer (XRD) (model: X'PERT PRO PANalytical) instruments. The morphology and elemental analysis were out by Carl Zeiss Ultra 55 FESEM and with EDAX: Inca instruments. The FTIR spectra were, recorded in the region of 400-4000 cm<sup>-1</sup> using the Perkin-Elmer spectrometer. A JASCO V-650 spectrophotometer measured the UV-Visible spectra of the CeO<sub>2</sub> NPs. The PL spectra were measured by using the JASCO Spectrofluorometer FP-8200.

### Antimicrobial assay

The antimicrobial assay of CeO<sub>2</sub>, MgCeO<sub>2</sub>, CaCeO<sub>2</sub>, SrCeO<sub>2</sub> and BaCeO<sub>2</sub> NMs were evaluated by the disc diffusion method tested *Streptococcus mutans* (MTCC 896) and *Staphylococcus aureus* (MTCC 96) strains. The bacterial suspension was prepared by inoculating into the Mueller-Hinton broth (MHB) and incubated at 37 °C until a final concentration of 10<sup>6</sup> CFU/mL was, reached. The test bacterial strains (100 µL) were, uniformly streaked MHA plates. After inoculation, 30µL of each NPs solution (CeO<sub>2</sub>, MgCeO<sub>2</sub>, CaCeO<sub>2</sub>, SrCeO<sub>2</sub> and BaCeO<sub>2</sub> at a concentration of 2 mg/mL), were loaded with 6 mm diameter discs and incubated for 24 h. The inhibition zones were measured. The Ofloxacin was used positive controls.

### Measurement of MIC and MBC assay

The MIC and MBC were calculated for SrCeO<sub>2</sub> and BaCeO<sub>2</sub> NMs by the Micro-dilution measurement in the current work. The SrCeO<sub>2</sub> and BaCeO<sub>2</sub> NMs stock solutions (50mg/mL) were, suspended in a sterile 0.5% of Dimethyl sulfoxide (DMSO). The various concentrations 200, 400, 600, 800, 1000, 1500 and 2000 µg/mL NPs located plate were inoculated with the test bacteria and growth colony formation were measured.

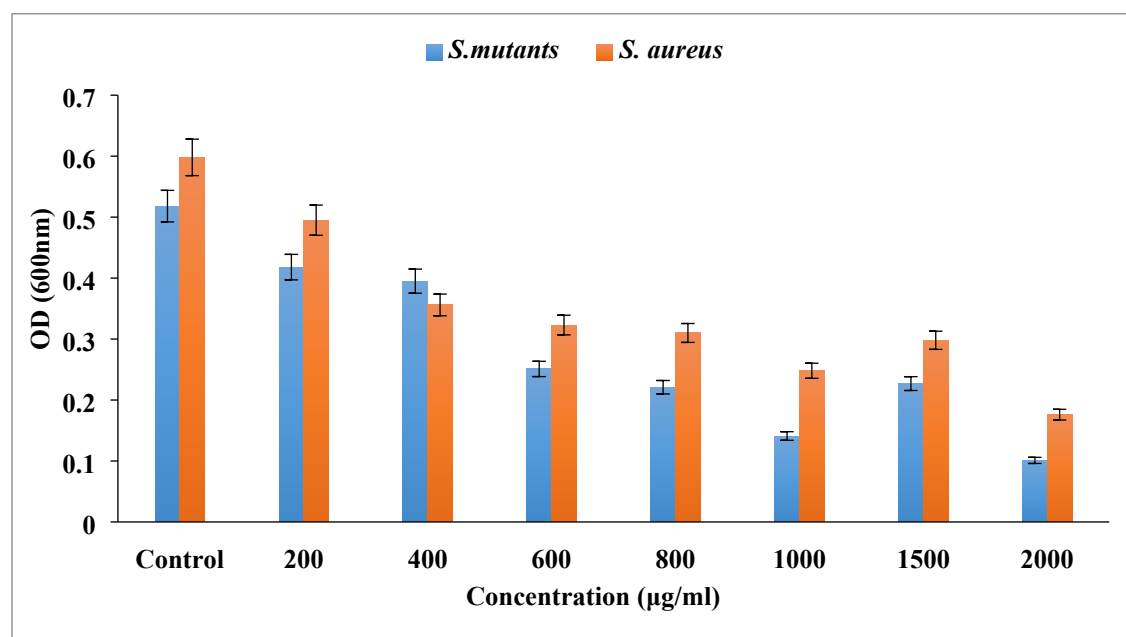

**Figure SI1:** Estimation of the MBC for SCO NMs

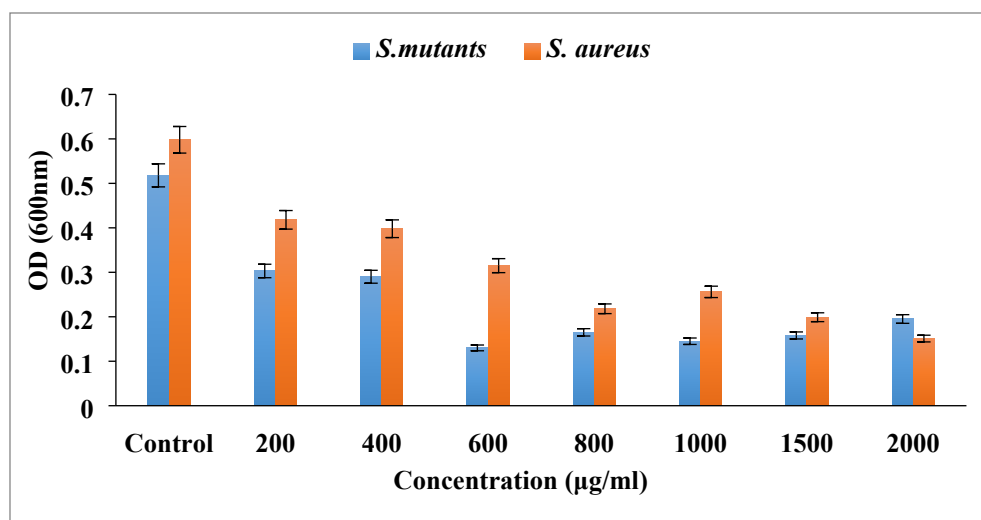

**Figure SI2:** Estimation of the MBC for BCO NMs
